# Supplementary material for: Temperature-programmed nitridation of monodispersed VOx nanoparticles into nanocrystalline superconducting oxygen-doped vanadium nitride
Source: Royal Society of Chemistry journal article supplement (doi:10.1039/d1nj00244a), 2021-01-01
Supplement: d1nj00244a1.pdf [file d1nj00244a1.pdf]

## Electronic Supplementary Information

### Temperature-programmed nitridation of monodispersed VO<sub>x</sub> nanoparticles into nanocrystalline superconducting oxygen-doped vanadium nitride

Khemchand Dewangan<sup>a\*</sup>, Dadan Singh<sup>a</sup>, Sandeep Kumar Singh Patel<sup>b</sup>, Kamlesh Shrivastava<sup>c\*</sup>

<sup>a</sup>Department of Chemistry, Indira Gandhi National Tribal University, Amarkantak-484887, India

<sup>b</sup>Department of Chemistry, MMV, Banaras Hindu University, Varanasi-221005, India

<sup>c</sup>School of Studies in Chemistry, Pt. Ravishankar Shukla University, Raipur-492010, CG, India

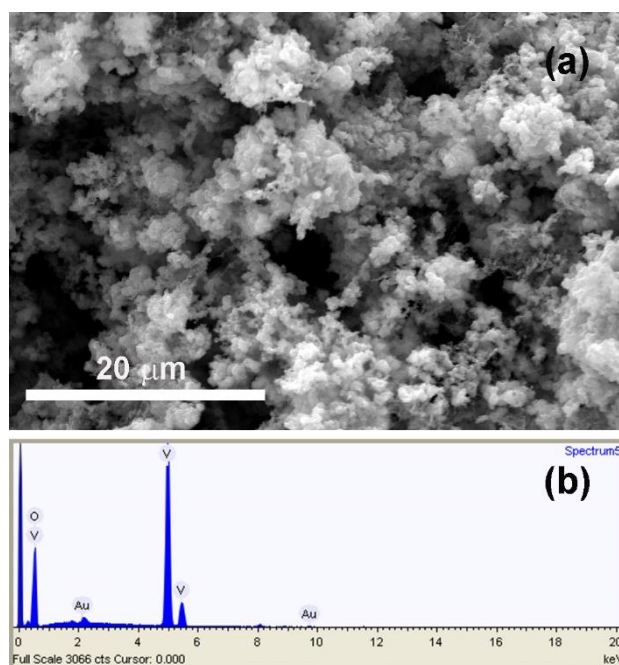

**Fig. S1** (a) SEM and (b) EDX of as-obtained VO<sub>x</sub>.

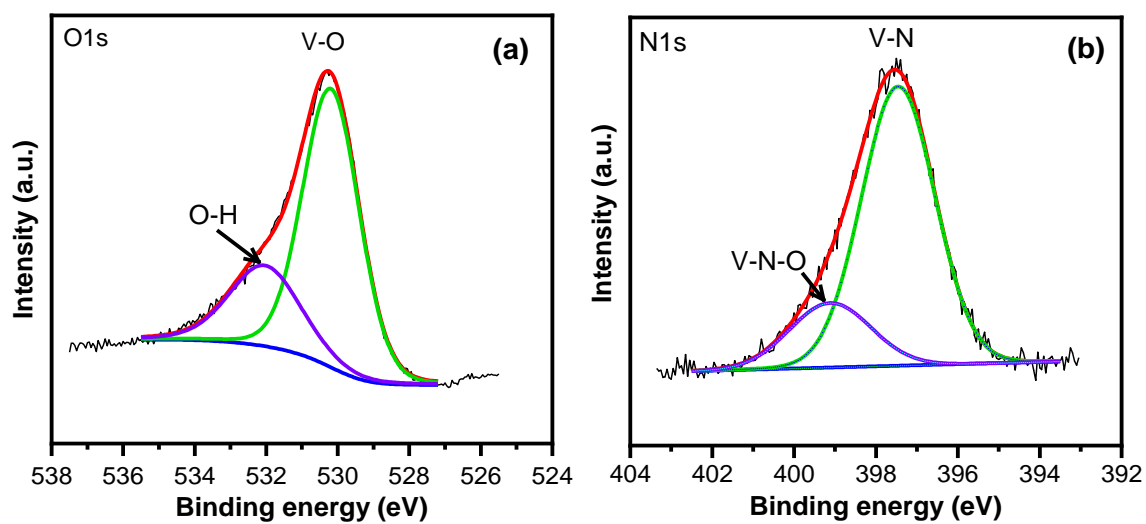

**Fig. S2** High-resolution XPS spectra of VN nanocrystals for (a) O (1s) and (b) N (1s).

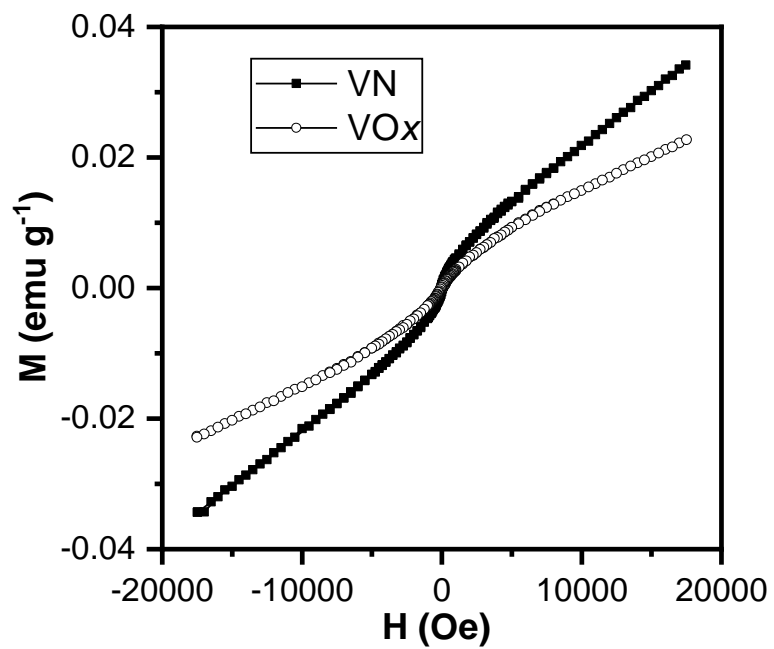

**Fig. S3** Magnetization versus magnetic field (M-H) curves of VO<sub>x</sub> and VN at room temperature.
